# Supplementary figures and images for: Correlation between Ferroptosis-Related Gene Signature and Immune Landscape, Prognosis in Breast Cancer
Source: Hindawi journal article supplement (doi:10.1155/2022/6871518), 2022-10-11

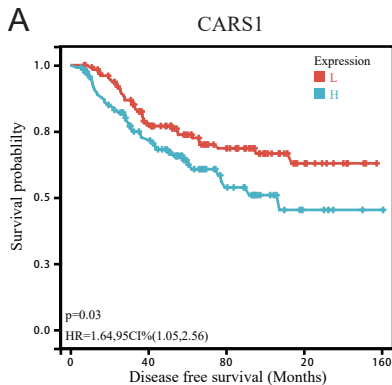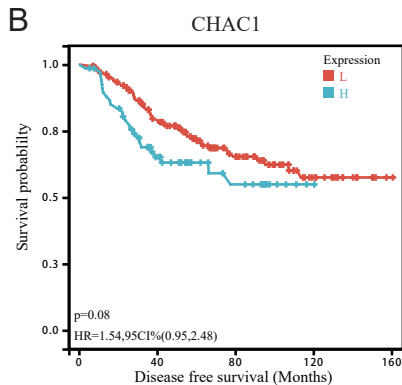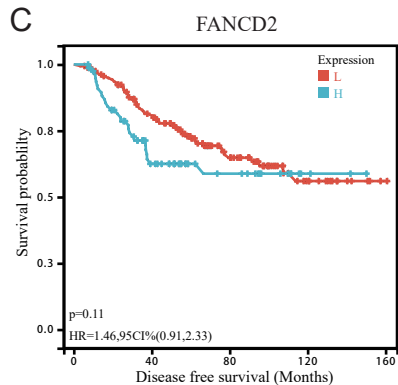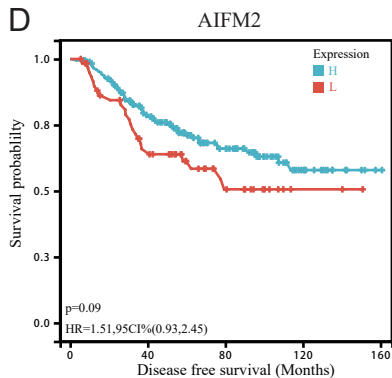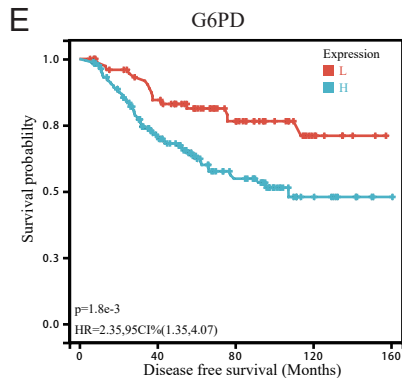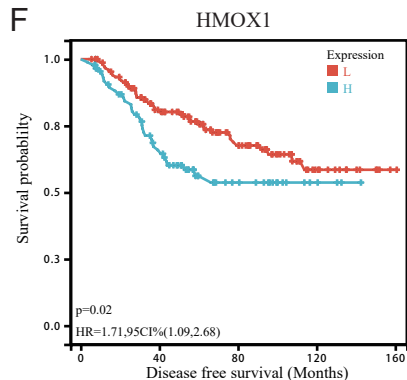

Supplement: f1 [file 6871518.f1.zip]

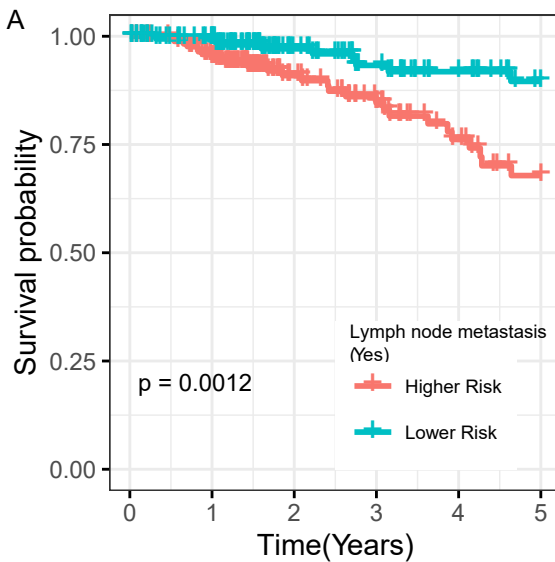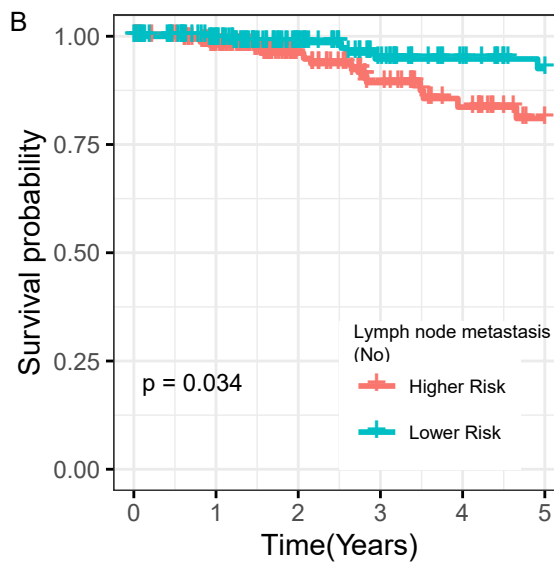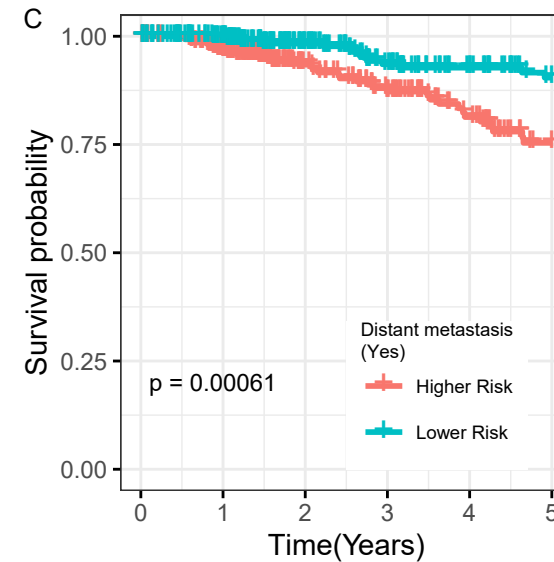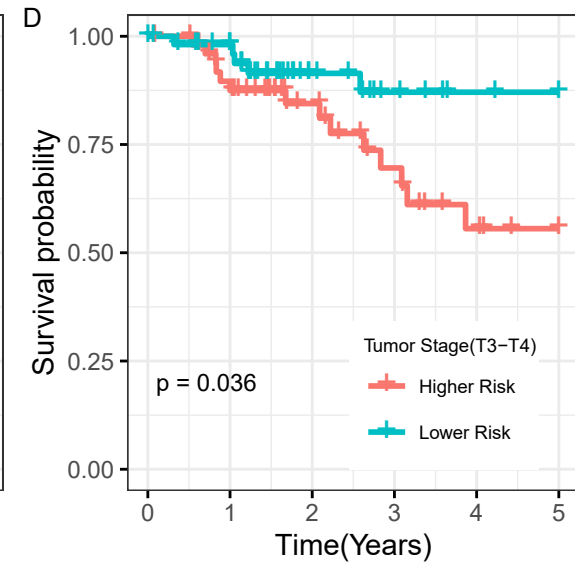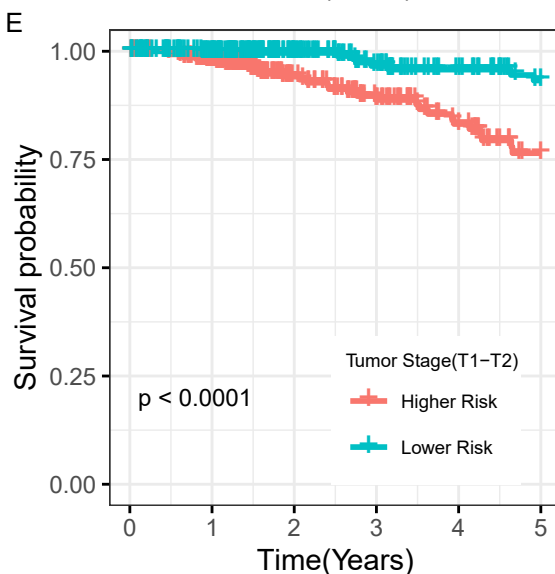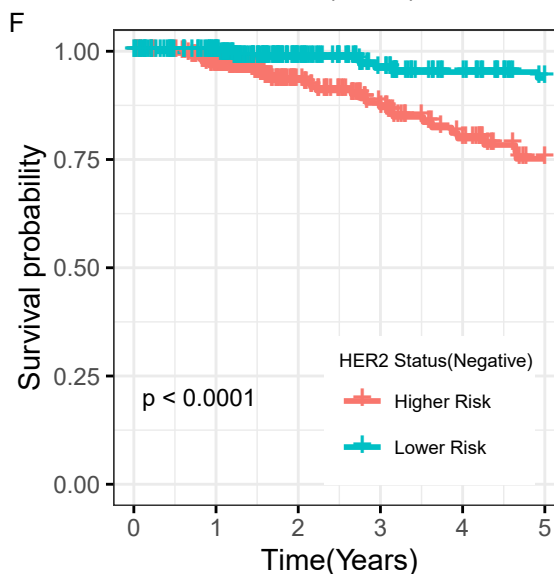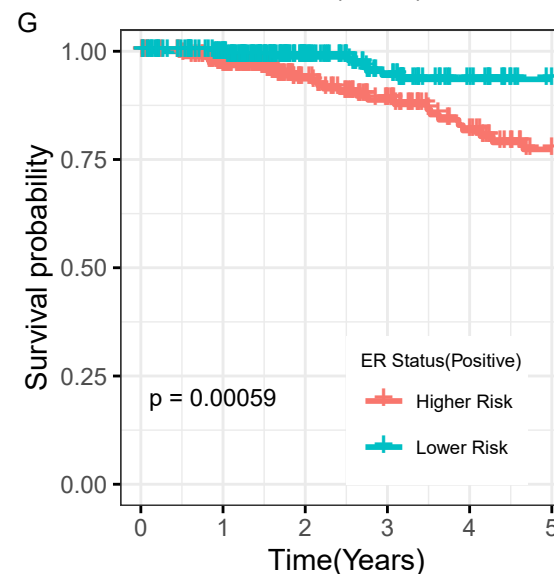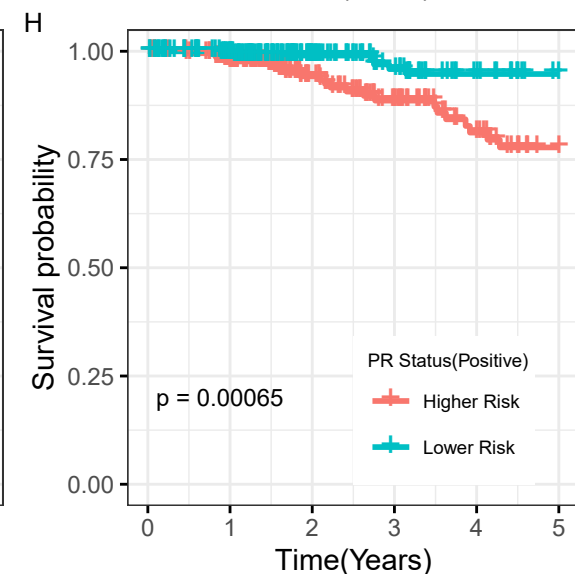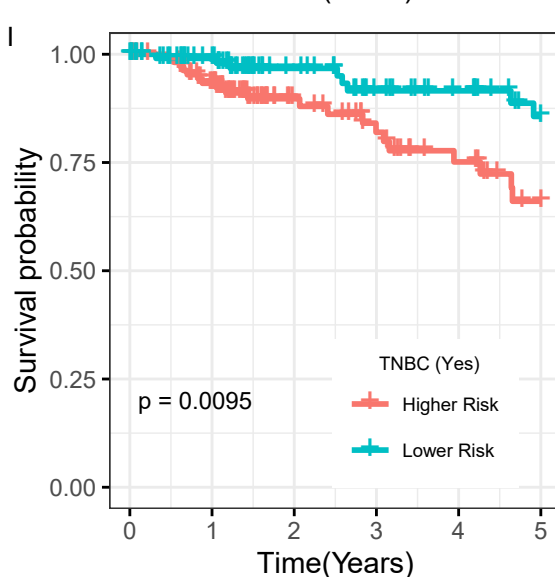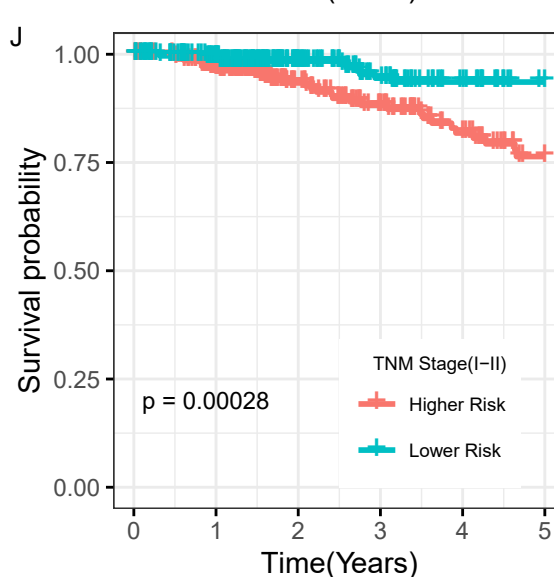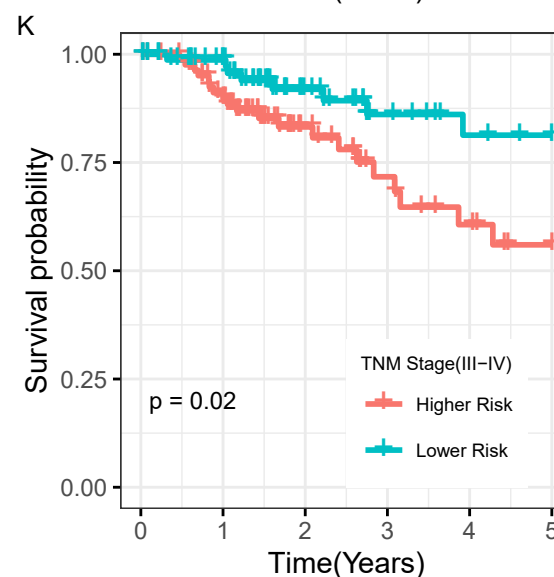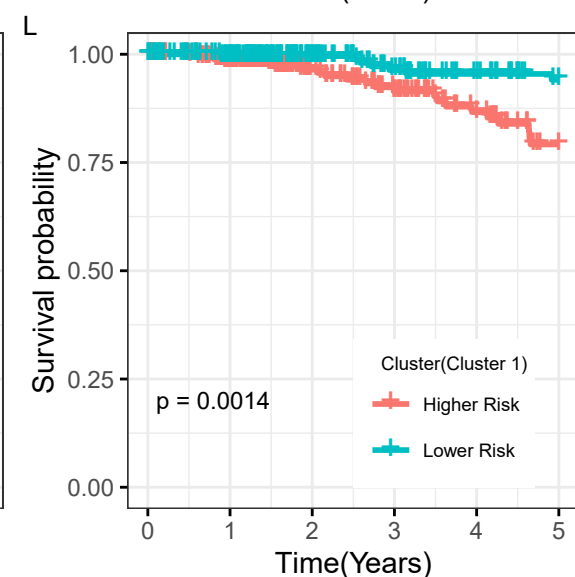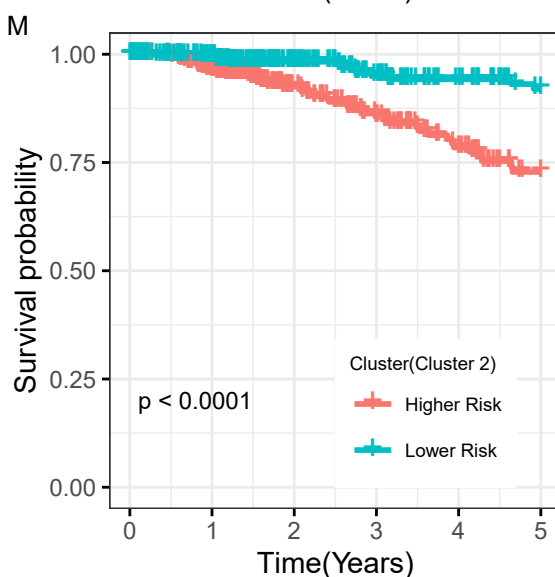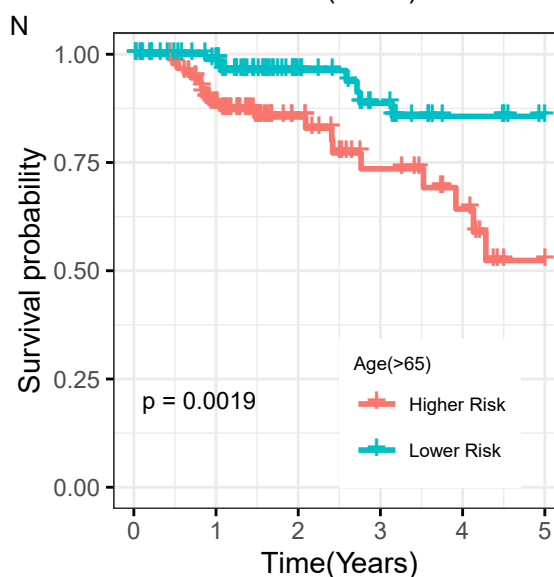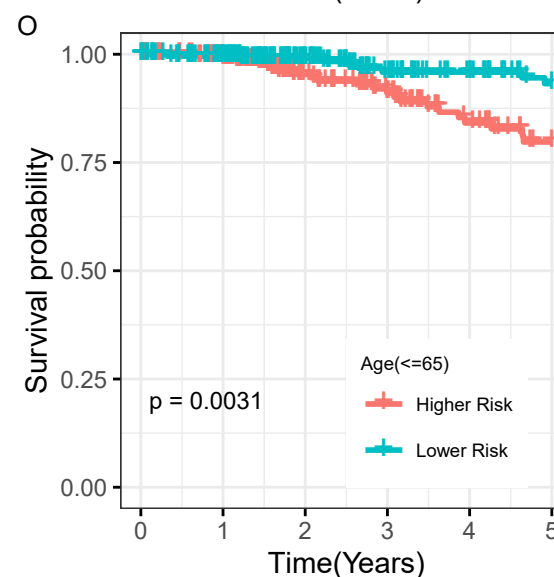

Supplement: f1 [file 6871518.f1.zip]

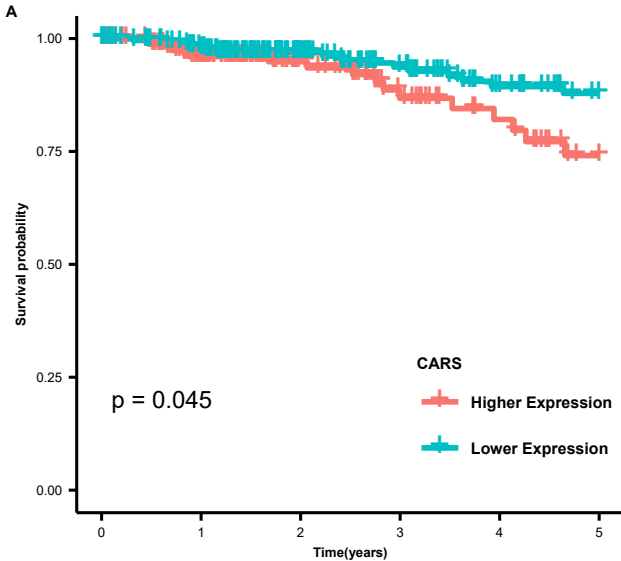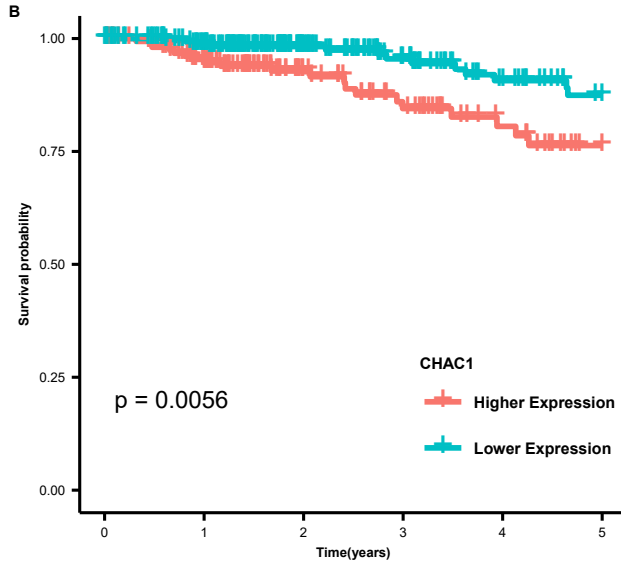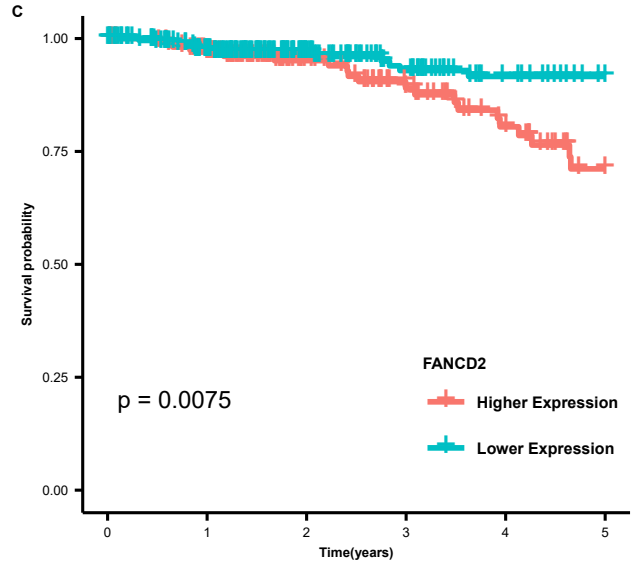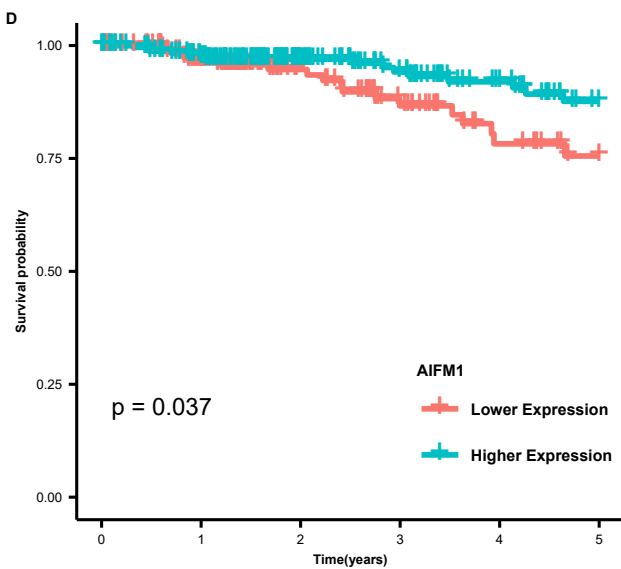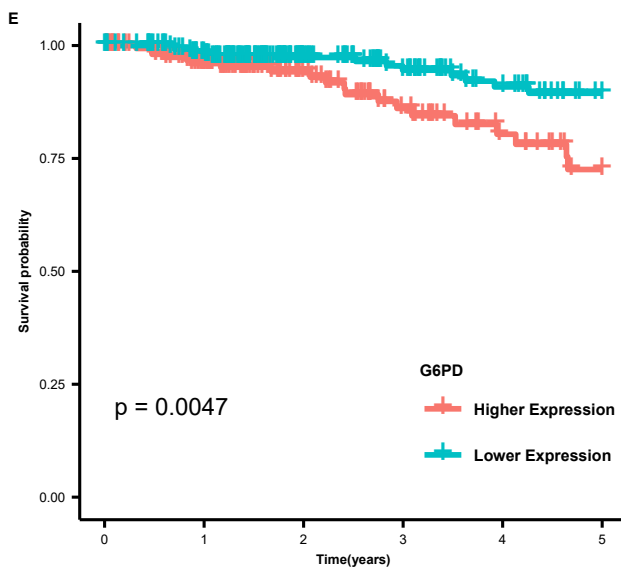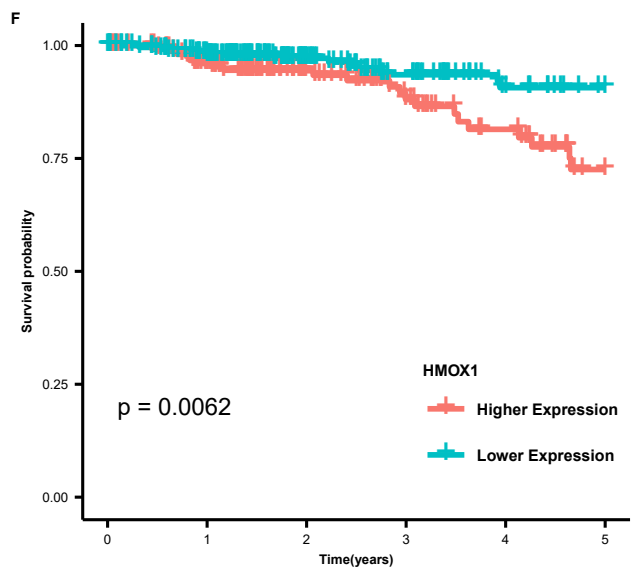

Supplement: f1 [file 6871518.f1.zip]

A

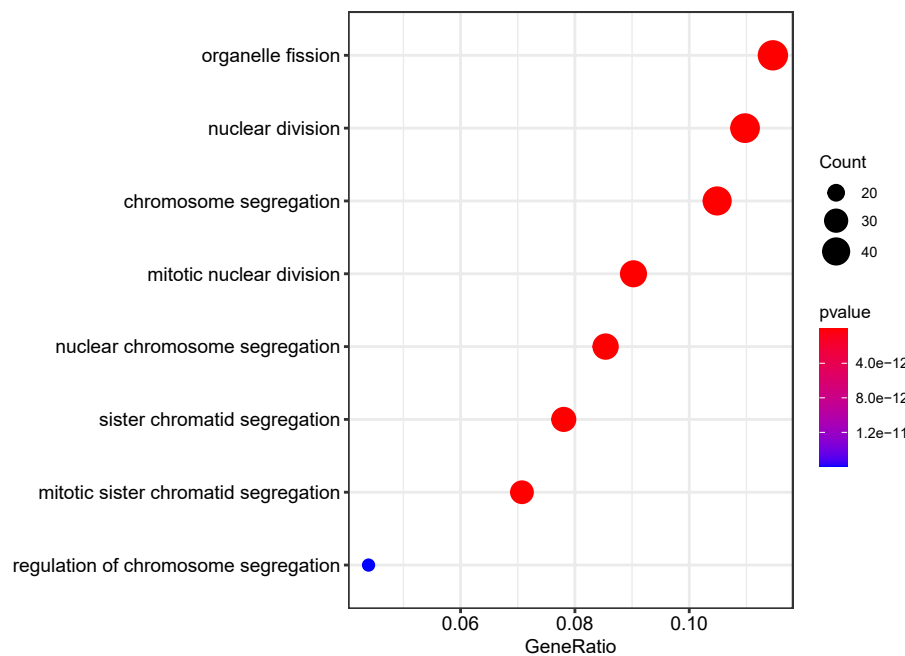

B

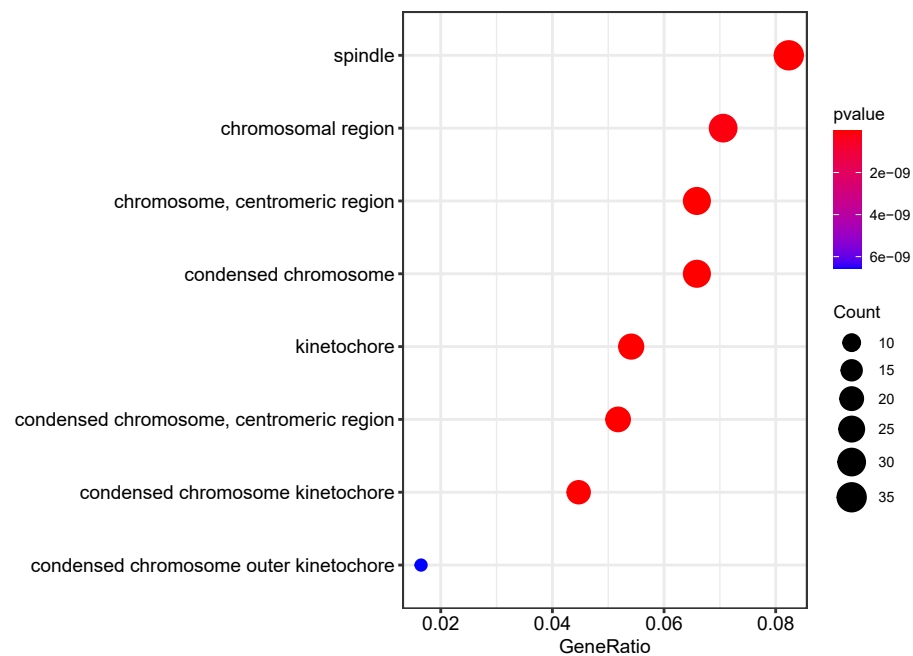

C

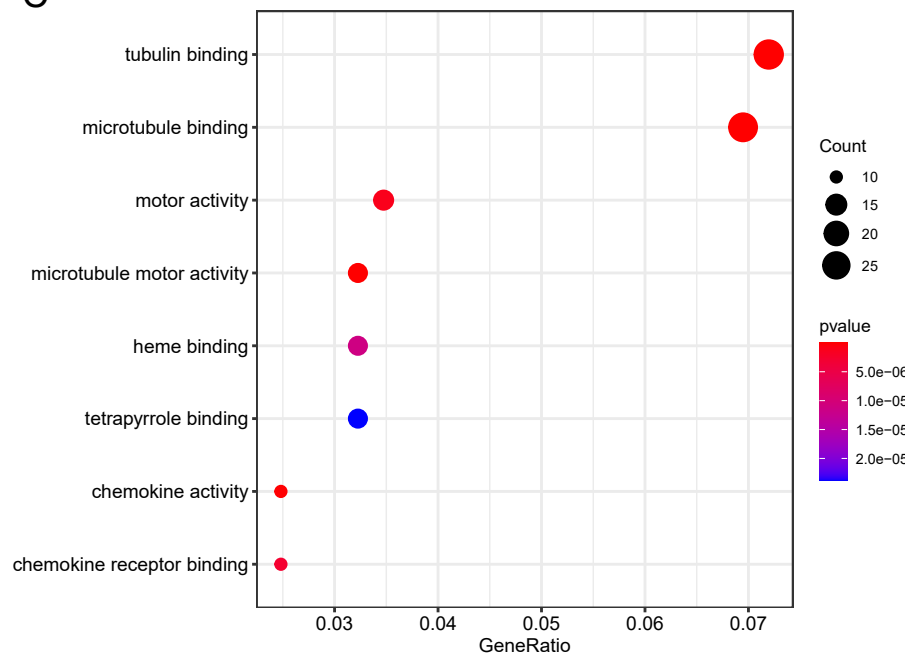

D

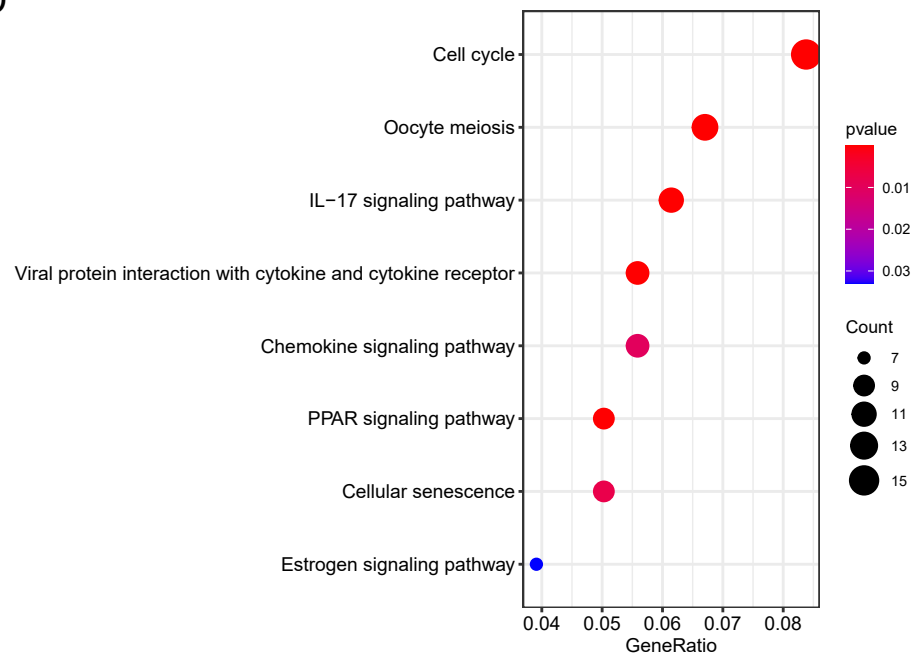

Supplement: f1 [file 6871518.f1.zip]

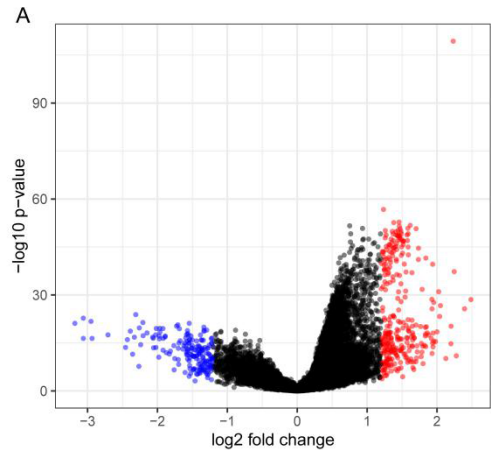

change

- down-regulated
- not-changed
- up-regulated

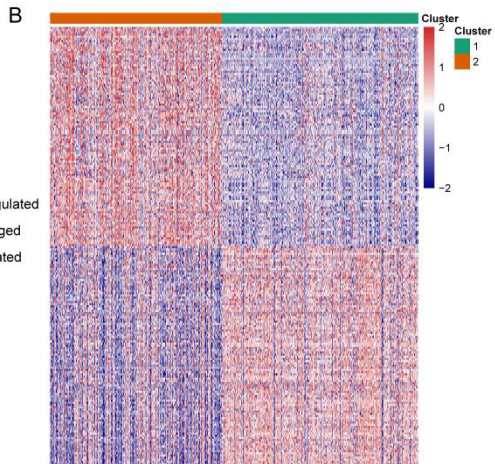

Supplement: f1 [file 6871518.f1.zip]

A

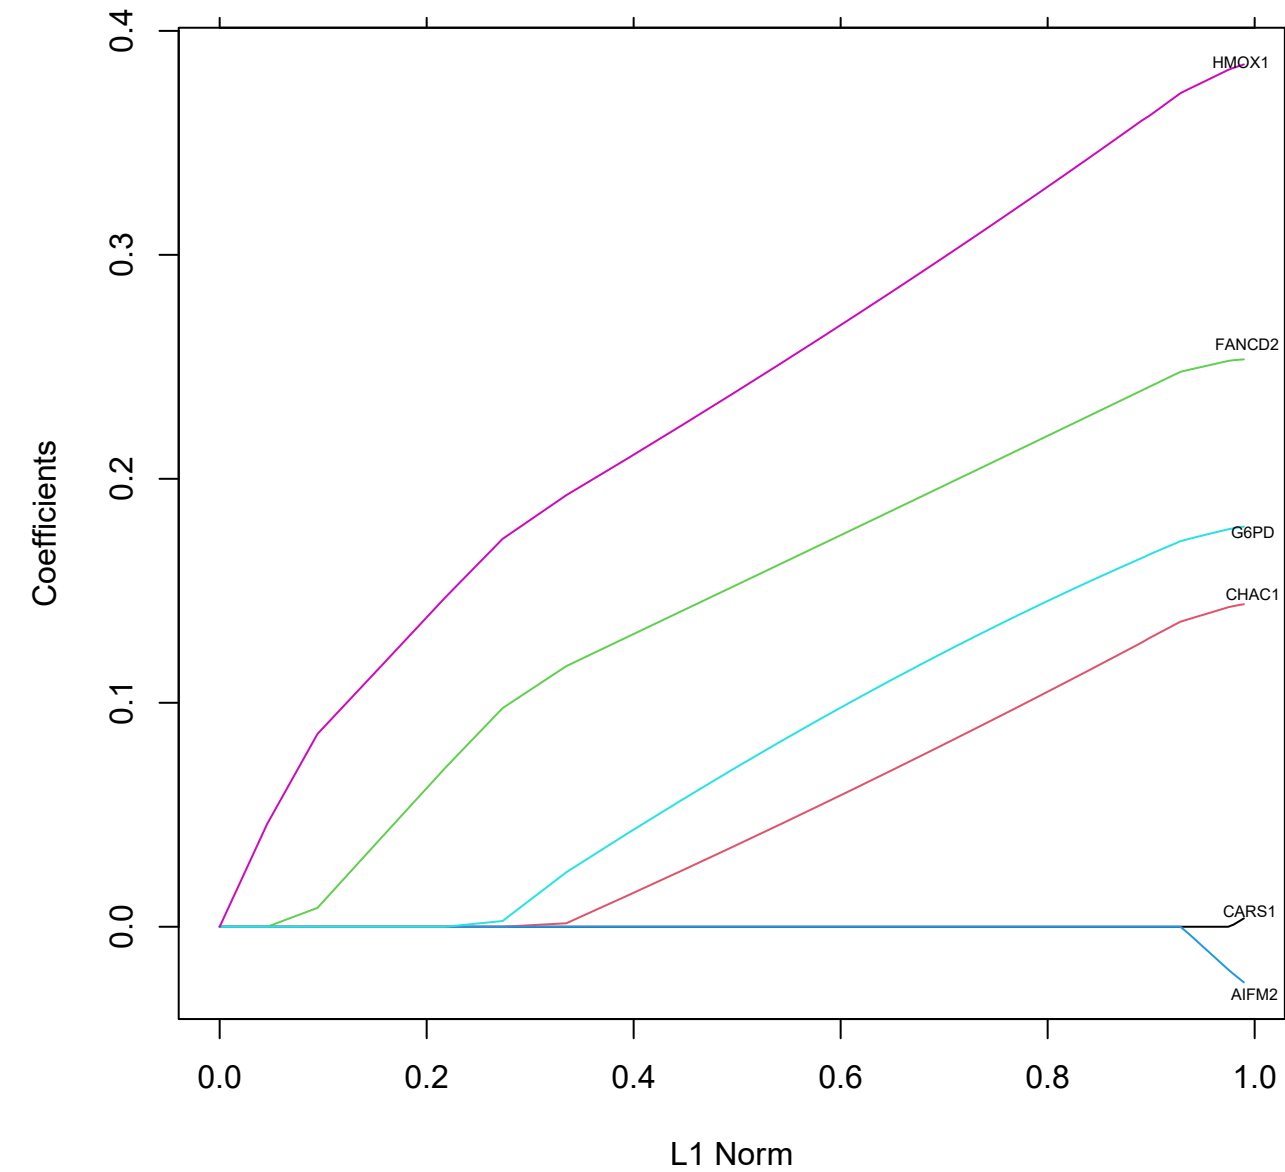

B

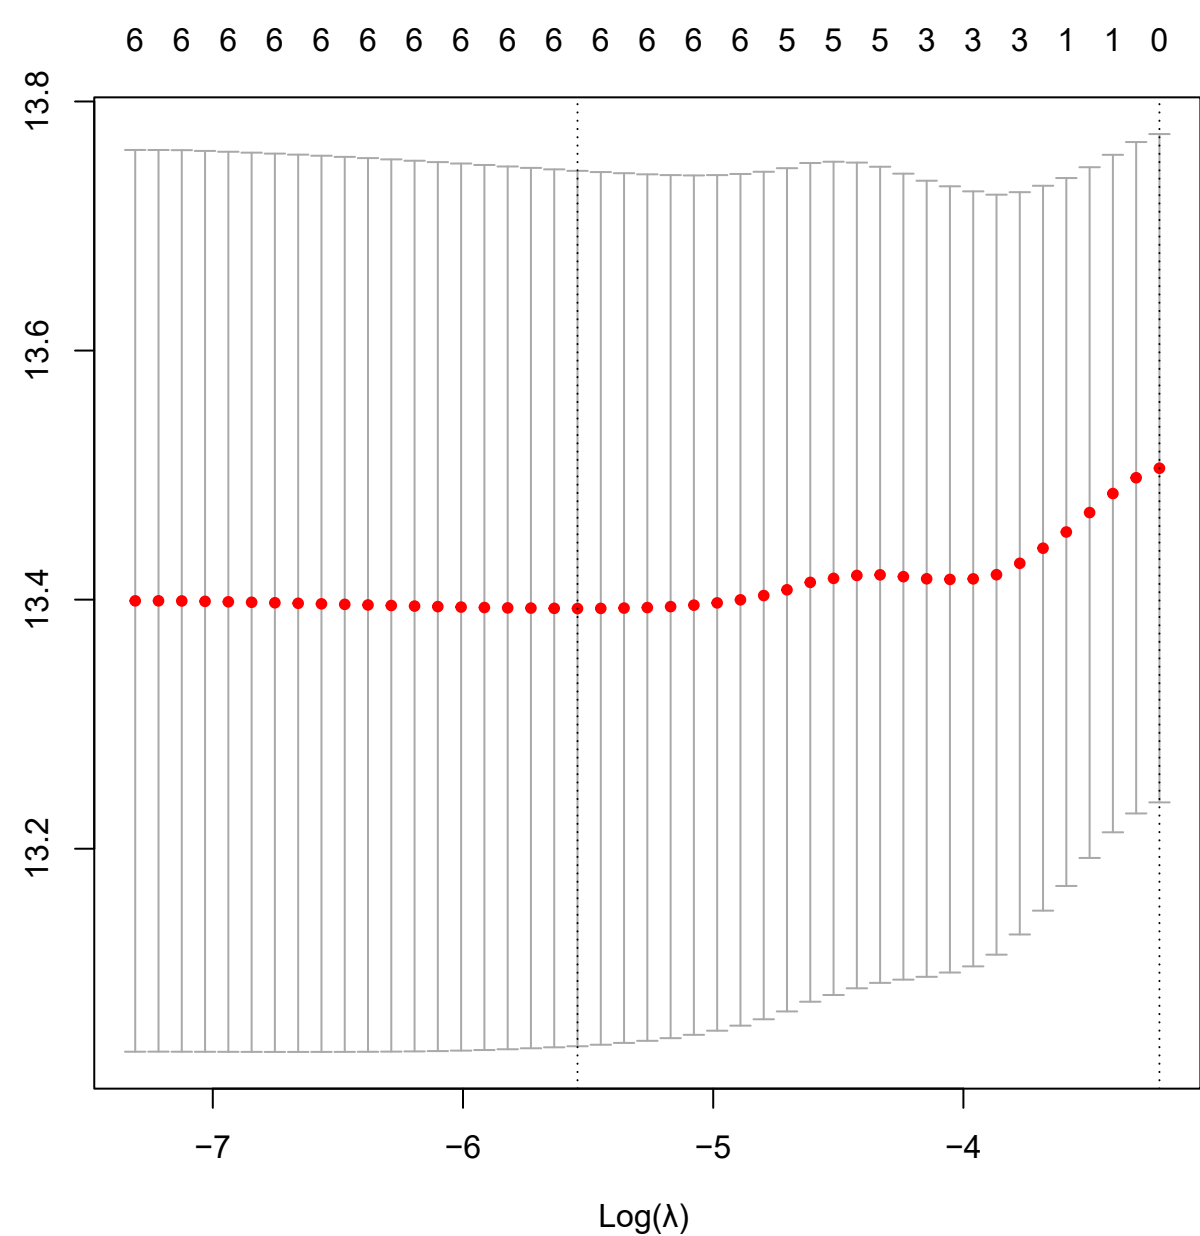

Supplement: f1 [file 6871518.f1.zip]
